# Supplementary material for: Use of an electronic decision support tool to reduce polypharmacy in elderly people with chronic diseases: cluster randomised controlled trial
Source: PubMed Central journal article supplement — BMJ. 2020 Jun 18;369:m1822. doi: 10.1136/bmj.m1822 (PMC7301164; doi:10.1136/bmj.m1822), 2020-06-18
Supplement: riea054179.ww.pdf [file riea054179.ww.pdf]

## Online Appendix

### Table of contents

|                                                                                                                           |    |
|---------------------------------------------------------------------------------------------------------------------------|----|
| Table 1a: Per-protocol analysis, results for primary and key secondary outcomes.....                                      | 1  |
| Table 2a: Number of recommendations elicited by the tool.....                                                             | 2  |
| Table 3a: Number of drugs and top 25 substances discontinued during the study .....                                       | 3  |
| Table 4a: Number of prescriptions and top 25 drugs eliciting reminders due to possible<br>contraindications.....          | 4  |
| Table 5a: Number of drugs and top 25 substances which elicited a reminder because no indication<br>was provided.....      | 5  |
| Table 6a: Most frequent category D interactions in the control group.....                                                 | 6  |
| Table 7a: Most frequent category D interactions in the decision support tool group .....                                  | 7  |
| Table 8a: Top 25 drugs eliciting reminders regarding renal dosing adjustment.....                                         | 8  |
| Table 9a: Top 25 drugs newly prescribed .....                                                                             | 9  |
| Table 10a: Total number of symptoms or possibly adverse drug reactions per patient at baseline<br>and at final visit..... | 10 |
| Table 11a: Symptoms or possibly adverse drug reactions within one month before or at baseline .                           | 10 |
| Table 12a: Symptoms or possibly adverse drug reactions within one month before or at final visit                          | 11 |
| Fig. 1a: Electronic decision support comprehensive medication review Part 1 .....                                         | 12 |
| Fig 2a: Electronic decision support comprehensive medication review Part 2 .....                                          | 13 |
| Fig 3a: Electronic case report form (eCRF).....                                                                           | 14 |

**Table 1a: Per-protocol analysis, results for primary and key secondary outcomes**

|                                                                                                                                                                                                                                                                                                                        | Control group |               | Decision support tool group |               | Adjusted comparison†     | p-value‡ |
|------------------------------------------------------------------------------------------------------------------------------------------------------------------------------------------------------------------------------------------------------------------------------------------------------------------------|---------------|---------------|-----------------------------|---------------|--------------------------|----------|
|                                                                                                                                                                                                                                                                                                                        | n             | Estimate*     | n                           | Estimate*     | Co-eff (95% CI)          |          |
| <b>Primary outcome</b>                                                                                                                                                                                                                                                                                                 |               |               |                             |               |                          |          |
| Death or first NEH                                                                                                                                                                                                                                                                                                     | 1712          | 873 (51.0%)   | 1682                        | 774 (46.0%)   | OR: 0.82 (0.68, 0.98)    | 0.026    |
| - Sensitivity, time to death or first NEH                                                                                                                                                                                                                                                                              | 1712          | 0.51 (0.01) ‡ | 1682                        | 0.46 (0.01) ‡ | HR: 0.88 (0.78, 1.00)    | 0.049    |
| <b>Key secondary outcome</b>                                                                                                                                                                                                                                                                                           |               |               |                             |               |                          |          |
| Last recorded number of drugs                                                                                                                                                                                                                                                                                          | 1712          | 10.59 (2.96)  | 1682                        | 10.11 (3.04)  | IRR: 0.95 (0.93, 0.97)   | <0.001   |
| - Sensitivity, change in drugs from baseline                                                                                                                                                                                                                                                                           | 1712          | 0.09 (2.10)   | 1682                        | -0.45 (2.20)  | MD: -0.50 (-0.71, -0.29) | <0.001   |
| *Mean (standard deviation) or number (%) unless otherwise indicated<br>†P-value based on the primary analysis<br>‡Estimated proportion (SE) reaching endpoint by 24 months, from survivor function.<br>NEH=Non-elective hospitalization. OR=Odds-ratio. HR=Hazard-ratio. IRR=Incidence-rate ratio. MD=Mean difference. |               |               |                             |               |                          |          |

**Table 2a: Number of recommendations elicited by the tool**

| Recommendation type                                                 | Control group (n=1519) |      | Decision support tool group (n=1509) |      |
|---------------------------------------------------------------------|------------------------|------|--------------------------------------|------|
|                                                                     | Mean/patient           | SD   | Mean/patient                         | SD   |
| Contraindicated drugs at T0                                         | 0.47                   | 0.90 | 0.47                                 | 0.90 |
| Contraindicated drugs at T3                                         | 0.30                   | 0.76 | 0.29                                 | 0.75 |
| Reduction of contraindicated drugs T0-T3                            | 0.17                   | 0.75 | 0.18                                 | 0.77 |
| Indications not provided at T0                                      | 2.92                   | 2.12 | 2.93                                 | 2.22 |
| Indications not provided at T3                                      | 2.79                   | 2.20 | 2.20                                 | 2.27 |
| Reduction in indications not provided T0-T3                         | 0.13                   | 1.58 | 0.73                                 | 1.92 |
| Interactions T0                                                     | 0.10                   | 0.36 | 0.13                                 | 0.41 |
| Interactions T3                                                     | 0.03                   | 0.20 | 0.04                                 | 0.24 |
| Reduction of interactions T0-T3                                     | 0.07                   | 0.35 | 0.09                                 | 0.37 |
| Recommendations based on best available evidence T0                 | 3.65                   | 1.90 | 3.53                                 | 1.84 |
| Recommendations based on best available evidence T3                 | 1.87                   | 2.34 | 1.44                                 | 2.00 |
| Reduction of recommendations based on best available evidence T0-T3 | 1.78                   | 2.52 | 2.09                                 | 2.31 |
| Renal-dosing-reminders T0                                           | 0.58                   | 1.39 | 0.59                                 | 1.42 |
| Renal-dosing-reminders T3                                           | 0.32                   | 1.06 | 0.31                                 | 1.07 |
| Reduction of renal-dosing-reminders T0-T3                           | 0.26                   | 1.42 | 0.28                                 | 1.39 |
| Total reminders T0                                                  | 7.77                   | 3.75 | 7.71                                 | 3.70 |
| Total reminders T3                                                  | 5.35                   | 3.69 | 4.33                                 | 4.20 |
| Reduction of total reminders T0-T3                                  | -2.43                  | 3.98 | -3.38                                | 4.06 |

T0=baseline visit. T3=final visit.

**Table 3a: Number of drugs and top 25 substances discontinued during the study**

| Control group (n=1519) |                               |                               |                                                    | Decision support tool group (n=1509) |                               |                               |                                                    |
|------------------------|-------------------------------|-------------------------------|----------------------------------------------------|--------------------------------------|-------------------------------|-------------------------------|----------------------------------------------------|
| Drug                   | Number of prescriptions at T0 | Number of prescriptions at T3 | Reduction in number of prescriptions from T0 to T3 | Drug                                 | Number of prescriptions at T0 | Number of prescriptions at T3 | Reduction in number of prescriptions from T0 to T3 |
| Total                  | 12761*                        | 11283*                        | 1478                                               | Total                                | 13514*                        | 10747*                        | 2767                                               |
| Hydrochlorothiazide    | 538                           | 420                           | 118                                                | Hydrochlorothiazide                  | 493                           | 331                           | 162                                                |
| Acetylsalicylic acid   | 671                           | 554                           | 117                                                | Acetylsalicylic acid                 | 618                           | 468                           | 150                                                |
| Simvastatin            | 667                           | 554                           | 113                                                | Simvastatin                          | 608                           | 464                           | 144                                                |
| Amlodipine             | 478                           | 409                           | 69                                                 | Ramipril                             | 420                           | 333                           | 87                                                 |
| Ramipril               | 415                           | 365                           | 50                                                 | Allopurinol                          | 328                           | 248                           | 80                                                 |
| Metformin              | 341                           | 297                           | 44                                                 | Metformin                            | 320                           | 245                           | 75                                                 |
| Phenprocoumon          | 209                           | 171                           | 38                                                 | Pantoprazole                         | 411                           | 344                           | 67                                                 |
| Allopurinol            | 299                           | 262                           | 37                                                 | Amlodipine                           | 408                           | 343                           | 65                                                 |
| Metoprolol             | 259                           | 236                           | 23                                                 | Furosemide                           | 303                           | 244                           | 59                                                 |
| Enalapril              | 97                            | 74                            | 23                                                 | Lansoprazole                         | 178                           | 135                           | 43                                                 |
| Digitoxin              | 82                            | 65                            | 17                                                 | Phenprocoumon                        | 214                           | 181                           | 33                                                 |
| Alendronate            | 99                            | 82                            | 17                                                 | Calcium carbonate                    | 163                           | 132                           | 31                                                 |
| Lisinopril             | 110                           | 94                            | 16                                                 | Metoprolol                           | 262                           | 231                           | 31                                                 |
| Pantoprazol            | 453                           | 438                           | 15                                                 | Doxazosin                            | 92                            | 62                            | 30                                                 |
| Bendroflumethiazide    | 48                            | 33                            | 15                                                 | Amiodaron                            | 60                            | 31                            | 29                                                 |
| Salmeterol             | 62                            | 47                            | 15                                                 | Omeprazol                            | 253                           | 225                           | 28                                                 |
| Glimepirid             | 62                            | 48                            | 14                                                 | Warfarin                             | 129                           | 101                           | 28                                                 |
| Clopidogrel            | 113                           | 99                            | 14                                                 | Diclofenac                           | 67                            | 39                            | 28                                                 |
| Doxazosin              | 109                           | 95                            | 14                                                 | Clopidogrel                          | 127                           | 100                           | 27                                                 |
| Candesartan            | 138                           | 124                           | 14                                                 | Atenolol                             | 73                            | 46                            | 27                                                 |
| Paracetamol            | 216                           | 202                           | 14                                                 | Tramadol                             | 80                            | 53                            | 27                                                 |
| Omeprazol              | 215                           | 202                           | 13                                                 | Codeine                              | 90                            | 65                            | 25                                                 |
| Isosorbiddinitrat      | 58                            | 46                            | 12                                                 | Bisoprolol                           | 470                           | 446                           | 24                                                 |
| Bisoprolol             | 454                           | 442                           | 12                                                 | Nebivolol                            | 83                            | 60                            | 23                                                 |
| Diclofenac             | 48                            | 37                            | 11                                                 | Lisinopril                           | 105                           | 82                            | 23                                                 |

\*only drugs with an equal or reduced number of prescriptions at T3

T0=baseline visit. T3=final visit.

**Table 4a: Number of prescriptions and top 25 drugs eliciting reminders due to possible contraindications**

| drug                  | Control group at T0 (n=1519) |                         | Decision support tool group at T0 (n=1509) |                         | Control group at T3 (n=1519) |                         | Decision support tool group at T3 (n=1509) |                         |
|-----------------------|------------------------------|-------------------------|--------------------------------------------|-------------------------|------------------------------|-------------------------|--------------------------------------------|-------------------------|
|                       | Number of prescriptions      | % of patients with drug | Number of prescriptions                    | % of patients with drug | Number of prescriptions      | % of patients with drug | Number of prescriptions                    | % of patients with drug |
| Total                 | 718                          |                         | 716                                        |                         | 455                          |                         | 437                                        |                         |
| Acetylsalicylic acid  | 74                           | 4.9                     | 76                                         | 5.0                     | 52                           | 3.4                     | 49                                         | 3.2                     |
| Hydrochlorothiazide   | 68                           | 4.5                     | 47                                         | 3.1                     | 30                           | 2.0                     | 24                                         | 1.6                     |
| Amlodipine            | 58                           | 3.8                     | 43                                         | 2.8                     | 30                           | 2.0                     | 33                                         | 2.2                     |
| Metformin             | 31                           | 2.0                     | 47                                         | 3.1                     | 24                           | 1.6                     | 27                                         | 1.8                     |
| Lercanidipin          | 29                           | 1.9                     | 36                                         | 2.4                     | 23                           | 1.5                     | 24                                         | 1.6                     |
| Glyceroltrinitrat     | 26                           | 1.7                     | 11                                         | 0.7                     | 19                           | 1.3                     | 11                                         | 0.7                     |
| Diclofenac            | 20                           | 1.3                     | 21                                         | 1.4                     | 9                            | 0.6                     | 10                                         | 0.7                     |
| Ibuprofen             | 20                           | 1.3                     | 23                                         | 1.5                     | 9                            | 0.6                     | 9                                          | 0.6                     |
| Timolol               | 17                           | 1.1                     | 12                                         | 0.8                     | 11                           | 0.7                     | 14                                         | 0.9                     |
| Bisoprolol            | 15                           | 1.0                     | 13                                         | 0.9                     | 15                           | 1.0                     | 6                                          | 0.4                     |
| Etoricoxib            | 14                           | 0.9                     | 21                                         | 1.4                     | 9                            | 0.6                     | 9                                          | 0.6                     |
| Oxycodon              | 14                           | 0.9                     | 14                                         | 0.9                     | 13                           | 0.9                     | 7                                          | 0.5                     |
| Valsartan             | 11                           | 0.7                     | 9                                          | 0.6                     | 5                            | 0.3                     | 10                                         | 0.7                     |
| Duloxetine            | 11                           | 0.7                     | 8                                          | 0.5                     | 4                            | 0.3                     | 2                                          | 0.1                     |
| Furosemide            | 10                           | 0.7                     | 10                                         | 0.7                     | 5                            | 0.3                     | 5                                          | 0.3                     |
| Diltiazem             | 10                           | 0.7                     | 6                                          | 0.4                     | 5                            | 0.3                     | 1                                          | 0.1                     |
| Celecoxib             | 10                           | 0.7                     | 8                                          | 0.5                     | 3                            | 0.2                     | 4                                          | 0.3                     |
| Metoprolol            | 9                            | 0.6                     | 10                                         | 0.7                     | 8                            | 0.5                     | 9                                          | 0.6                     |
| Felodipin             | 8                            | 0.5                     | 3                                          | 0.2                     | 6                            | 0.4                     | 1                                          | 0.1                     |
| Candesartan           | 8                            | 0.5                     | 11                                         | 0.7                     | 4                            | 0.3                     | 6                                          | 0.4                     |
| Hydromorphon          | 8                            | 0.5                     | 2                                          | 0.1                     | 5                            | 0.3                     | 1                                          | 0.1                     |
| Ursodesoxycholic acid | 7                            | 0.5                     | 6                                          | 0.4                     | 1                            | 0.1                     | 2                                          | 0.1                     |
| Nifedipin             | 7                            | 0.5                     | 14                                         | 0.9                     | 6                            | 0.4                     | 5                                          | 0.3                     |
| Glimepirid            | 6                            | 0.4                     | 13                                         | 0.9                     | 3                            | 0.2                     | 7                                          | 0.5                     |
| Sotalol               | 6                            | 0.4                     | 15                                         | 1.0                     | 3                            | 0.2                     | 4                                          | 0.3                     |

T0=baseline visit. T3=final visit.

**Table 5a: Number of drugs and top 25 substances which elicited a reminder because no indication was provided**

| Drug                 | Control group at T0<br>(n=1519)        |                                                   | Decision support<br>tool group at T0<br>(n=1509) |                                                   | Control group at T3<br>(n=1519)        |                                                   | Decision support<br>tool group at T3<br>(n=1509) |                                                   |
|----------------------|----------------------------------------|---------------------------------------------------|--------------------------------------------------|---------------------------------------------------|----------------------------------------|---------------------------------------------------|--------------------------------------------------|---------------------------------------------------|
|                      | Number<br>of drugs<br>not<br>indicated | % of<br>patients<br>with drug<br>not<br>indicated | Number<br>of drugs<br>not<br>indicated           | % of<br>patients<br>with drug<br>not<br>indicated | Number<br>of drugs<br>not<br>indicated | % of<br>patients<br>with drug<br>not<br>indicated | Number<br>of drugs<br>not<br>indicated           | % of<br>patients<br>with drug<br>not<br>indicated |
| Total                | 4441                                   |                                                   | 4427                                             |                                                   | 4240                                   |                                                   | 3321                                             |                                                   |
| Pantoprazole         | 238                                    | 15.7                                              | 228                                              | 15.1                                              | 224                                    | 14.7                                              | 148                                              | 9.8                                               |
| Metamizol            | 213                                    | 14.0                                              | 170                                              | 11.3                                              | 234                                    | 15.4                                              | 181                                              | 12.0                                              |
| Cholecalciferol      | 168                                    | 11.1                                              | 188                                              | 12.5                                              | 190                                    | 12.5                                              | 156                                              | 10.3                                              |
| Acetylsalicylic acid | 167                                    | 11.0                                              | 147                                              | 9.7                                               | 142                                    | 9.3                                               | 102                                              | 6.8                                               |
| Simvastatin          | 124                                    | 8.2                                               | 98                                               | 6.5                                               | 87                                     | 5.7                                               | 66                                               | 4.4                                               |
| Omeprazole           | 115                                    | 7.6                                               | 138                                              | 9.1                                               | 111                                    | 7.3                                               | 96                                               | 6.4                                               |
| Lansoprazole         | 112                                    | 7.4                                               | 117                                              | 7.8                                               | 98                                     | 6.5                                               | 77                                               | 5.1                                               |
| Allopurinol          | 93                                     | 6.1                                               | 98                                               | 6.5                                               | 75                                     | 4.9                                               | 46                                               | 3.0                                               |
| Macrogol             | 86                                     | 5.7                                               | 74                                               | 4.9                                               | 108                                    | 7.1                                               | 71                                               | 4.7                                               |
| Paracetamol          | 84                                     | 5.5                                               | 58                                               | 3.8                                               | 63                                     | 4.1                                               | 37                                               | 2.5                                               |
| Codeine              | 76                                     | 5.0                                               | 88                                               | 5.8                                               | 67                                     | 4.4                                               | 63                                               | 4.2                                               |
| Levothyroxine        | 62                                     | 4.1                                               | 65                                               | 4.3                                               | 48                                     | 3.2                                               | 39                                               | 2.6                                               |
| Naloxon              | 57                                     | 3.8                                               | 49                                               | 3.2                                               | 55                                     | 3.6                                               | 35                                               | 2.3                                               |
| Gabapentin           | 53                                     | 3.5                                               | 46                                               | 3.0                                               | 53                                     | 3.5                                               | 38                                               | 2.5                                               |
| Calcium carbonate    | 50                                     | 3.3                                               | 56                                               | 3.7                                               | 41                                     | 2.7                                               | 43                                               | 2.8                                               |
| Pregabalin           | 49                                     | 3.2                                               | 28                                               | 1.9                                               | 46                                     | 3.0                                               | 28                                               | 1.9                                               |
| Bendroflumethiazide  | 48                                     | 3.2                                               | 40                                               | 2.7                                               | 33                                     | 2.2                                               | 33                                               | 2.2                                               |
| Oxycodon             | 47                                     | 3.1                                               | 43                                               | 2.8                                               | 53                                     | 3.5                                               | 44                                               | 2.9                                               |
| Tamsulosin           | 44                                     | 2.9                                               | 45                                               | 3.0                                               | 36                                     | 2.4                                               | 32                                               | 2.1                                               |
| Atorvastatin         | 43                                     | 2.8                                               | 32                                               | 2.1                                               | 51                                     | 3.4                                               | 25                                               | 1.7                                               |
| Triazolam            | 42                                     | 2.8                                               | 45                                               | 3.0                                               | 41                                     | 2.7                                               | 32                                               | 2.1                                               |
| Phenprocoumon        | 40                                     | 2.6                                               | 38                                               | 2.5                                               | 36                                     | 2.4                                               | 27                                               | 1.8                                               |
| Isosorbidmononitrat  | 39                                     | 2.6                                               | 44                                               | 2.9                                               | 35                                     | 2.3                                               | 25                                               | 1.7                                               |
| Cyanocobalamin       | 38                                     | 2.5                                               | 34                                               | 2.3                                               | 44                                     | 2.9                                               | 26                                               | 1.7                                               |
| Zolpidem             | 36                                     | 2.4                                               | 47                                               | 3.1                                               | 37                                     | 2.4                                               | 41                                               | 2.7                                               |

T0=baseline visit. T3=final visit.

**Table 6a: Most frequent category D interactions in the control group**

| T0 control group (n=15199) |                    |                        | T3 control group (n=1519) |                      |                        |
|----------------------------|--------------------|------------------------|---------------------------|----------------------|------------------------|
| Drug-1                     | Drug-2             | Number of interactions | Drug-1                    | Drug-2               | Number of interactions |
| ASA                        | Phenprocoumon      | 27                     | Acetylsalicylic acid      | Phenprocoumon        | 9                      |
| ASA                        | Warfarin           | 16                     | Tramadol                  | Warfarin             | 4                      |
| Diclofenac                 | Phenprocoumon      | 8                      | Acetylsalicylic acid      | Warfarin             | 2                      |
| Ibuprofen                  | Phenprocoumon      | 6                      | Levothyroxine             | Polystyrolsulfonat   | 2                      |
| Tramadol                   | Warfarin           | 6                      | Diclofenac                | Phenprocoumon        | 2                      |
| Acenocoumarol              | ASA                | 3                      | Codeine                   | Duloxetine           | 2                      |
| Metoprolol                 | Verapamil          | 3                      | Potassium-chloride        | Spironolacton        | 1                      |
| Amlodipine                 | Carbamazepine      | 3                      | Acenocoumarol             | Acetylsalicylic acid | 1                      |
| Acenocoumarol              | Diclofenac         | 2                      | Apixaban                  | Phenprocoumon        | 1                      |
| Canrenone                  | Potassium chloride | 2                      | Apixaban                  | Rivaroxaban          | 1                      |
| Diltiazem                  | Domperidon         | 2                      | Digoxine                  | Verapamil            | 1                      |
| Diltiazem                  | Triazolam          | 2                      | Amiodarone                | Citalopram           | 1                      |
| Diltiazem                  | Timolol            | 2                      | Amiodarone                | Donepezil            | 1                      |
| Levothyroxin-Natrium       | Polystyrolsulfonat | 2                      | Canrenone                 | Potassium-chloride   | 1                      |
| Ibuprofen                  | Phenprocoumon      | 2                      | Amiloride                 | Potassium-chloride   | 1                      |
| Diclofenac                 | Phenprocoumon      | 2                      | Diltiazem                 | Triamcinolone        | 1                      |
| Acetylsalicylic acid       | Phenprocoumon      | 2                      | Metoprolol                | Verapamil            | 1                      |
| Carbamazepin               | Rivaroxaban        | 2                      | Atenolol                  | Verapamil            | 1                      |
| Carbamazepin               | Felodipin          | 2                      | Lercanidipin              | Primidon             | 1                      |
| Citalopram                 | Flecainide         | 2                      | Diltiazem                 | Nebivolol            | 1                      |
| Codeine                    | Paroxetin          | 2                      | Diltiazem                 | Nifedipin            | 1                      |
| Codeine                    | Duloxetin          | 2                      | Diltiazem                 | Triazolam            | 1                      |
| Kaliumchlorid              | Spironolacton      | 1                      | Diltiazem                 | Timolol              | 1                      |
| Kaliumchlorid              | Triamteren         | 1                      | Diclofenac                | Phenprocoumon        | 1                      |
| Kaliumcitrat               | Spironolacton      | 1                      | Ciproterone               | Phenobarbital        | 1                      |

T0=baseline visit. T3=final visit.

**Table 7a: Most frequent category D interactions in the decision support tool group**

| Decision support tool group at T0 (n=1509) |                       |                        | Decision support tool group at T3 (n=1509) |                  |                        |
|--------------------------------------------|-----------------------|------------------------|--------------------------------------------|------------------|------------------------|
| Drug-1                                     | Drug-2                | Number of interactions | Drug-1                                     | Drug-2           | Number of interactions |
| ASA                                        | Phenprocoumon         | 23                     | Acetylsalicylic acid                       | Phenprocoumon    | 7                      |
| ASA                                        | Warfarin              | 15                     | Acetylsalicylic acid                       | Warfarin         | 4                      |
| Diclofenac                                 | Phenprocoumon         | 8                      | Diclofenac                                 | Phenprocoumon    | 3                      |
| Ibuprofen                                  | Warfarin              | 5                      | Acetylsalicylic acid                       | Phenprocoumon    | 3                      |
| Tramadol                                   | Warfarin              | 5                      | Aliskiren                                  | Ramipril         | 2                      |
| Digoxin                                    | Verapamil             | 4                      | Naproxen                                   | Phenprocoumon    | 2                      |
| Diltiazem                                  | Timolol               | 4                      | Celecoxib                                  | Phenprocoumon    | 2                      |
| Ibuprofen                                  | Phenprocoumon         | 4                      | Ibuprofen                                  | Phenprocoumon    | 2                      |
| Acetylsalicylic acid                       | Phenprocoumon         | 4                      | Domperidon                                 | Donepezil        | 1                      |
| Amiodarone                                 | Citalopram            | 3                      | Phenprocoumon                              | Piroxicam        | 1                      |
| Ibuprofen                                  | Phenprocoumon         | 3                      | Phenprocoumon                              | Tiaprofenic acid | 1                      |
| Carbamazepin                               | Tamsulosin            | 3                      | Clopidogrel                                | Repaglinide      | 1                      |
| Duloxetine                                 | Tramadol              | 3                      | Apixaban                                   | Dabigatran       | 1                      |
| Codeine                                    | Paroxetine            | 3                      | Digoxine                                   | Verapamil        | 1                      |
| Clopidogrel                                | Repaglinide           | 2                      | Amiodarone                                 | Citalopram       | 1                      |
| Amiodarone                                 | Domperidon            | 2                      | Glyceroltrinitrate                         | Vardenafil       | 1                      |
| Amiodarone                                 | Diltiazem             | 2                      | Ibuprofen                                  | Phenprocoumon    | 1                      |
| Ibuprofen                                  | Phenprocoumon         | 2                      | Metoprolol                                 | Verapamil        | 1                      |
| Amilorid                                   | Potassium-<br>acetate | 2                      | Atenolol                                   | Diltiazem        | 1                      |
| Metoprolol                                 | Verapamil             | 2                      | Amlodipin                                  | Primidon         | 1                      |
| Bisoprolol                                 | Diltiazem             | 2                      | Amlodipin                                  | Carbamazepin     | 1                      |
| Nebivolol                                  | Paroxetin             | 2                      | Diltiazem                                  | Timolol          | 1                      |
| Amlodipin                                  | Primidone             | 2                      | Aliskiren                                  | Telmisartan      | 1                      |
| Amlodipin                                  | Carbamazepin          | 2                      | Gemfibrozil                                | Lovastatin       | 1                      |
| Diltiazem                                  | Triazolam             | 2                      | Colestyramine                              | Warfarin         | 1                      |

T0=baseline visit. T3=final visit.

**Table 8a: Top 25 drugs eliciting reminders regarding renal dosing adjustment**

| Drug                                           | Control group at T0                           |                            | Decision support tool group at T0             |                            | Control group at T3                           |                            | Decision support tool group at T3             |                            |
|------------------------------------------------|-----------------------------------------------|----------------------------|-----------------------------------------------|----------------------------|-----------------------------------------------|----------------------------|-----------------------------------------------|----------------------------|
|                                                | Number of drugs causing renal dosing problems | % of all patients (n=1519) | Number of drugs causing renal dosing problems | % of all patients (n=1509) | Number of drugs causing renal dosing problems | % of all patients (n=1519) | Number of drugs causing renal dosing problems | % of all patients (n=1509) |
| Total reminders                                | 877                                           |                            | 896                                           |                            | 488                                           |                            | 473                                           |                            |
| Patients with at least 1 renal dosing reminder | 290                                           | 19.1                       | 297                                           | 19.7                       | 167                                           | 10.5                       | 159                                           | 10.5                       |
| Allopurinol                                    | 94                                            | 6.2                        | 105                                           | 7.0                        | 48                                            | 3.2                        | 49                                            | 3.2                        |
| Metamizole                                     | 66                                            | 4.3                        | 41                                            | 2.7                        | 51                                            | 3.4                        | 30                                            | 2.0                        |
| Acetylsalicylic acid                           | 52                                            | 3.4                        | 46                                            | 3.0                        | 26                                            | 1.7                        | 6                                             | 0.4                        |
| Spironolactone                                 | 37                                            | 2.4                        | 40                                            | 2.7                        | 21                                            | 1.4                        | 19                                            | 1.3                        |
| Metformin                                      | 36                                            | 2.4                        | 40                                            | 2.7                        | 21                                            | 1.4                        | 16                                            | 1.1                        |
| Candesartan                                    | 34                                            | 2.2                        | 46                                            | 3.0                        | 18                                            | 1.2                        | 23                                            | 1.5                        |
| Simvastatin                                    | 32                                            | 2.1                        | 34                                            | 2.3                        | 18                                            | 1.2                        | 20                                            | 1.3                        |
| Furosemide                                     | 29                                            | 1.9                        | 25                                            | 1.7                        | 15                                            | 1.0                        | 19                                            | 1.3                        |
| Ramipril                                       | 29                                            | 1.9                        | 23                                            | 1.5                        | 5                                             | 0.3                        | 9                                             | 0.6                        |
| Calcium carbonate                              | 19                                            | 1.3                        | 26                                            | 1.7                        | 17                                            | 1.1                        | 13                                            | 0.9                        |
| Mirtazapine                                    | 16                                            | 1.1                        | 14                                            | 0.9                        | 9                                             | 0.6                        | 7                                             | 0.5                        |
| Bisoprolol                                     | 14                                            | 0.9                        | 22                                            | 1.5                        | 9                                             | 0.6                        | 14                                            | 0.9                        |
| Hydrochlorothiazide                            | 13                                            | 0.9                        | 13                                            | 0.9                        | 7                                             | 0.5                        | 4                                             | 0.3                        |
| Ibuprofen                                      | 13                                            | 0.9                        | 9                                             | 0.6                        | 5                                             | 0.3                        | 3                                             | 0.2                        |
| Moxonidin                                      | 13                                            | 0.9                        | 14                                            | 0.9                        | 16                                            | 1.1                        | 7                                             | 0.5                        |
| Sitagliptin                                    | 13                                            | 0.9                        | 11                                            | 0.7                        | 5                                             | 0.3                        | 2                                             | 0.1                        |
| Tiotropium bromide                             | 13                                            | 0.9                        | 13                                            | 0.9                        | 7                                             | 0.5                        | 8                                             | 0.5                        |
| Amitriptylin                                   | 12                                            | 0.8                        | 9                                             | 0.6                        | 6                                             | 0.4                        | 4                                             | 0.3                        |
| Codein                                         | 12                                            | 0.8                        | 17                                            | 1.1                        | 5                                             | 0.3                        | 5                                             | 0.3                        |
| Insulin glargin                                | 12                                            | 0.8                        | 11                                            | 0.7                        | 6                                             | 0.4                        | 5                                             | 0.3                        |

T0=baseline visit. T3=final visit.

**Table 9a: Top 25 drugs newly prescribed**

| Control group   |                               |                               |                                                   | Decision support tool group |                               |                               |                                                   |
|-----------------|-------------------------------|-------------------------------|---------------------------------------------------|-----------------------------|-------------------------------|-------------------------------|---------------------------------------------------|
| Drug            | Number of prescriptions at T0 | Number of prescriptions at T3 | Increase in number of prescriptions from T0 to T3 | Drug                        | Number of prescriptions at T0 | Number of prescriptions at T3 | Increase in number of prescriptions from T0 to T3 |
| Total           | 2992*                         | 3762*                         | 770                                               | Total                       | 2274*                         | 2793*                         | 519                                               |
| Apixaban        | 22                            | 77                            | 55                                                | Apixaban                    | 8                             | 60                            | 52                                                |
| Cholecalciferol | 399                           | 444                           | 45                                                | Macrogol                    | 90                            | 104                           | 14                                                |
| Atorvastatin    | 230                           | 267                           | 37                                                | Rivaroxaban                 | 50                            | 64                            | 14                                                |
| Macrogol        | 104                           | 131                           | 27                                                | Atorvastatin                | 230                           | 244                           | 14                                                |
| Metamizol       | 218                           | 239                           | 21                                                | Edoxaban                    | 0                             | 13                            | 13                                                |
| Rivaroxaban     | 59                            | 73                            | 14                                                | Xipamid                     | 25                            | 37                            | 12                                                |
| Tapentadol      | 18                            | 32                            | 14                                                | Febuxostat                  | 17                            | 29                            | 12                                                |
| Linagliptin     | 1                             | 14                            | 13                                                | Metamizol                   | 171                           | 182                           | 11                                                |
| Spironolacton   | 102                           | 113                           | 11                                                | Linagliptin                 | 7                             | 16                            | 9                                                 |
| Hydromorphon    | 22                            | 33                            | 11                                                | Tapentadol                  | 8                             | 16                            | 8                                                 |
| Glycopyrronium  | 12                            | 23                            | 11                                                | Natriumhydrogencarbonat     | 8                             | 16                            | 8                                                 |
| Edoxaban        | 0                             | 10                            | 10                                                | Insulin detemir             | 23                            | 31                            | 8                                                 |
| Sertraline      | 24                            | 34                            | 10                                                | Prednisolone                | 13                            | 21                            | 8                                                 |
| Xipamid         | 22                            | 31                            | 9                                                 | Beclometasone               | 47                            | 54                            | 7                                                 |
| Indacaterol     | 7                             | 16                            | 9                                                 | Hypromellose                | 8                             | 14                            | 6                                                 |
| Ipratropium     | 23                            | 31                            | 8                                                 | Fentanyl                    | 19                            | 25                            | 6                                                 |
| Cyanocobalamin  | 42                            | 49                            | 7                                                 | Formoterol                  | 103                           | 109                           | 6                                                 |
| Insulin glargin | 92                            | 98                            | 6                                                 | Vilanterol                  | 0                             | 6                             | 6                                                 |
| Folic acid      | 46                            | 52                            | 6                                                 | Dorzolamid                  | 16                            | 22                            | 6                                                 |
| Ezetimib        | 45                            | 51                            | 6                                                 | Hydroxocobalamin            | 7                             | 12                            | 5                                                 |
| Quetiapin       | 8                             | 14                            | 6                                                 | Bumetanide                  | 9                             | 14                            | 5                                                 |
| Trazodon        | 25                            | 31                            | 6                                                 | Ibuprofen (topical)         | 36                            | 41                            | 5                                                 |
| Melperon        | 9                             | 14                            | 5                                                 | Mirtazapin                  | 57                            | 62                            | 5                                                 |
| Donepezil       | 3                             | 8                             | 5                                                 | Brimonidine                 | 8                             | 13                            | 5                                                 |
| Latanoprost     | 32                            | 37                            | 5                                                 | Salbutamol                  | 132                           | 136                           | 4                                                 |

T0=baseline visit. T3=final visit.

\* Only drugs with an increase in prescriptions from T0 to T3

**Table 10a: Total number of symptoms or possibly adverse drug reactions per patient at baseline and at final visit**

| Symptoms                     | Decision support tool group |      |     | Control group |      |     | p-value* |
|------------------------------|-----------------------------|------|-----|---------------|------|-----|----------|
|                              | n                           | mean | SD  | n             | mean | SD  |          |
| at T0 (baseline)             | 1681                        | 4.0  | 2.9 | 1705          | 4.2  | 3.1 | -        |
| Symptoms at T3 (final visit) | 1553                        | 2.8  | 2.6 | 1632          | 3.1  | 2.6 | 0.338    |

\* p-value from Poisson regression analysis, controlled for pre-specified covariates, number of symptoms at baseline, and clustering of patients in practices.

**Table 11a: Symptoms or possibly adverse drug reactions within one month before or at baseline**

| Symptom      | Control group (n=1705)* |      | Decision support tool group (n=1681)* |      |
|--------------|-------------------------|------|---------------------------------------|------|
|              | n                       | %    | n                                     | %    |
| constipation | 367                     | 21.5 | 332                                   | 19.8 |
| nausea       | 164                     | 9.6  | 140                                   | 8.3  |
| diarrhea     | 171                     | 10.0 | 166                                   | 9.9  |
| dyspepsia    | 347                     | 20.4 | 357                                   | 21.2 |
| cough        | 361                     | 21.2 | 372                                   | 22.1 |
| dyspnea      | 512                     | 30.0 | 554                                   | 33.0 |
| dizziness    | 633                     | 37.1 | 618                                   | 36.8 |
| fatigue      | 774                     | 45.4 | 761                                   | 45.3 |
| sleeping     | 547                     | 32.1 | 520                                   | 30.9 |
| cognitive    | 225                     | 13.2 | 192                                   | 11.4 |
| pain         | 992                     | 58.2 | 951                                   | 56.6 |
| swollen legs | 469                     | 27.5 | 429                                   | 25.5 |
| nycturia     | 477                     | 28.0 | 464                                   | 27.6 |
| skin rash    | 227                     | 13.3 | 184                                   | 10.9 |
| xerostomia   | 335                     | 19.6 | 267                                   | 15.9 |
| bleeding     | 48                      | 2.8  | 48                                    | 2.9  |
| weight loss  | 82                      | 4.8  | 65                                    | 3.9  |
| sweating     | 177                     | 10.4 | 191                                   | 11.4 |
| other        | 176                     | 10.3 | 154                                   | 9.2  |

\* n's differ from PPA of primary endpoint due to missing data

**Table 12a: Symptoms or possibly adverse drug reactions within one month before or at final visit**

| symptom      | Control group (n=1632)* |      | Decision support tool (n=1553)* |      |
|--------------|-------------------------|------|---------------------------------|------|
|              | n                       | %    | n                               | %    |
| constipation | 210                     | 12.9 | 177                             | 11.4 |
| nausea       | 129                     | 7.9  | 75                              | 4.8  |
| diarrhea     | 100                     | 6.1  | 67                              | 4.3  |
| dyspepsia    | 176                     | 10.8 | 147                             | 9.5  |
| cough        | 228                     | 14.0 | 187                             | 12.0 |
| dyspnea      | 330                     | 20.2 | 294                             | 18.9 |
| dizziness    | 446                     | 27.3 | 399                             | 25.7 |
| fatigue      | 615                     | 37.7 | 509                             | 32.8 |
| sleeping     | 312                     | 19.1 | 261                             | 16.8 |
| cognitive    | 378                     | 23.2 | 330                             | 21.2 |
| pain         | 616                     | 37.7 | 573                             | 36.9 |
| swollen legs | 299                     | 18.3 | 245                             | 15.8 |
| nycturia     | 235                     | 14.4 | 236                             | 15.2 |
| skin rash    | 95                      | 5.8  | 83                              | 5.3  |
| xerostomia   | 328                     | 20.1 | 271                             | 17.5 |
| bleeding     | 60                      | 3.7  | 47                              | 3.0  |
| weight loss  | 136                     | 8.3  | 98                              | 6.3  |
| sweating     | 194                     | 11.9 | 200                             | 12.9 |
| other        | 105                     | 6.4  | 82                              | 5.3  |

\* n's differ from PPA of primary endpoint due to missing data

**Fig. 1a: Electronic decision support comprehensive medication review Part 1**

## EBMEDS Comprehensive Medication Review

Comprehensive Medication Review is based on the patient data entered on the eCRF form using several knowledge databases. It's essential that both medication and diagnosis data are up to date before doing the comprehensive medication review. Always check the medication list and if necessary add missing diagnosis. Read more about each section by pressing the info buttons [i](#)

[Print Review](#)

### Medication and Indications [i](#)

| Drug                                       | Active ingredient | ATC     | Strength | Dosage | Daily dose | Start Date |
|--------------------------------------------|-------------------|---------|----------|--------|------------|------------|
| <b>Flagyl</b>                              | metronidazole     | P01AB01 | 400 mg   | 1 x 3  | 1200 mg    | 2017-02-13 |
| • Please check the indication              |                   |         |          |        |            |            |
| <b>Fosamax</b>                             | alendronate       | M05BA04 | 10 mg    | 1 x 2  | 20 mg      | 2011-08-24 |
| • Postmenopausal osteoporosis (2017-02-12) |                   |         |          |        |            |            |
| <b>Burana</b>                              | ibuprofen         | M01AE01 | 400 mg   | 1 x 3  | 1200 mg    | 2015-06-24 |
| • Rheumatoid arthritis (2017-02-12)        |                   |         |          |        |            |            |
| <b>Trexan</b>                              | methotrexate      | L01BA01 | 10 mg    |        |            | 2017-02-13 |
| • Rheumatoid arthritis (2017-02-12)        |                   |         |          |        |            |            |
| <b>Marevan</b>                             | warfarin          | B01AA03 | 3 mg     | 1 x 1  | 3 mg       | 2016-04-19 |
| • Atrial Fibrillation (2017-02-12)         |                   |         |          |        |            |            |
| <b>Metform</b>                             | metformin         | A10BA02 | 500 mg   | 1 x 2  | 1000 mg    | 2015-06-24 |
| • Type 2 diabetes (2017-02-12)             |                   |         |          |        |            |            |
| <b>Zantac</b>                              | ranitidine        | A02BA02 | 150 mg   | 1 x 1  | 150 mg     | 2017-02-13 |
| • Please check the indication              |                   |         |          |        |            |            |

### Measurement Results [i](#)

| Name    | Result                | Date       |
|---------|-----------------------|------------|
| S-Krea  | 115 $\mu\text{mol/l}$ | 2017-02-13 |
| B-HbA1c | 6 %                   | 2017-02-12 |
| fP-Gluk | 5 mmol/l              | 2017-02-12 |
| B-Leuk  | 2.9 $10^6/\text{ml}$  | 2017-02-12 |
| P-ALAT  | 59 U/l                | 2016-02-09 |
| B-Hb    | 130 g/l               | 2016-11-05 |
| INR     | 2.5                   | 2017-02-12 |
| B-Trom  | 200 $10^9/\text{l}$   | 2016-11-05 |

### Reminders [i](#)

|                   |                                                                                                                                                                                                                                                                        |                   |                   |
|-------------------|------------------------------------------------------------------------------------------------------------------------------------------------------------------------------------------------------------------------------------------------------------------------|-------------------|-------------------|
| <a href="#">i</a> | This patient's glomerular filtration rate (38 ml/min 13/02/2017) is low, and the patient is using regular NSAID medication Burana. It may have an adverse effect on the glomerular function. Consider discontinuing it or replacing it with, for example, paracetamol. | <a href="#">i</a> | <a href="#">✕</a> |
| <a href="#">i</a> | This patient has been taking bisphosphonates ( Fosamax) for osteoporosis for more than 5 years. Assess the patient for fracture risk and consider discontinuing the drug or pausing it for 3 - 5 years.                                                                | <a href="#">i</a> | <a href="#">✕</a> |
| <a href="#">i</a> | This patient is taking methotrexate (Trexan), but no folic acid has been prescribed. Folic acid is recommended at a dose of 3-5 mg/week, taken on the same day as methotrexate. (DynaMed Plus)                                                                         | <a href="#">i</a> | <a href="#">✕</a> |

### Contraindications [i](#)

No reminders returned

### Drug Dosage [i](#)

|                   |                                                                                                                                                     |                   |
|-------------------|-----------------------------------------------------------------------------------------------------------------------------------------------------|-------------------|
| <a href="#">i</a> | Overdose of the drug Fosamax (daily dose 20 mg)? The recommended maximal daily dose in the assumed indication Postmenopausal osteoporosis is 10 mg. | <a href="#">✕</a> |
|-------------------|-----------------------------------------------------------------------------------------------------------------------------------------------------|-------------------|

**Fig 2a: Electronic decision support comprehensive medication review Part 2**

**Dosage in Renal Malfunction** ⓘ

GFR = 38 ml/min - moderate renal failure

|                                           | GFR 90–60 ml/min<br>mild renal failure | GFR 60–30 ml/min<br>moderate renal failure<br>38 ml/min | GFR 30–15 ml/min<br>severe renal failure | GFR <15 ml/min<br>end-stage renal failure |
|-------------------------------------------|----------------------------------------|---------------------------------------------------------|------------------------------------------|-------------------------------------------|
| <b>ranitidine</b><br>enteral-peroral      | A<br>No dosage modification            | C<br>Reduce dose 50%                                    | C<br>Reduce dose 50%                     | C<br>Reduce dose 50 - 75%                 |
| <b>methotrexate</b><br>enteral-peroral    | C                                      | C                                                       | D<br>Avoid usage                         | D<br>Avoid usage                          |
| <b>warfarin</b><br>enteral-peroral        | C                                      | C                                                       | C                                        | C                                         |
| <b>metformin</b><br>enteral-peroral       | C                                      | C<br>Reduce dose 30%                                    | D<br>Avoid usage                         | D<br>Avoid usage                          |
| <b>ibuprofen</b><br>enteral-peroral       | A<br>No dosage modification            | C<br>No dosage modification                             | D<br>Avoid usage                         | D<br>Avoid usage                          |
| <b>alendronic acid</b><br>enteral-peroral | A<br>No dosage modification            | A<br>No dosage modification                             | D<br>Avoid usage                         | B                                         |

- ⓘ The patient uses the drug Burana, which contains ibuprofen, with a daily dose of 1200 mg. Dosing interval: 8 h. The drug is also nephrotoxic. [C] ⓘ
- ⓘ The patient uses the drug Marevan, which contains warfarin, with a daily dose of 3 mg. See detailed description [C] ⓘ
- ⓘ The patient uses the drug Metformin, which contains metformin, with a daily dose of 1000 mg. Has the dosage already been optimized? Renbase recommends to decrease the normal dose with 30 - 75% [C] ⓘ
- ⓘ The patient uses the drug Trexan, which contains methotrexate. See detailed description. The drug is also nephrotoxic. [C] ⓘ
- ⓘ The patient uses the drug Zantac, which contains ranitidine, with a daily dose of 150 mg. Has the dosage already been optimized? Renbase recommends to decrease the normal dose with 50% [C] ⓘ

**Adverse effects potentially caused by drugs (riskbase®)** ⓘ

|                   | Risk of bleeding | Renal toxicity | Risk of seizures | Anticholinergic effect | Constipation | Orthostatism | QT-prolongation | Sedation | Serotonergic effect |
|-------------------|------------------|----------------|------------------|------------------------|--------------|--------------|-----------------|----------|---------------------|
| <b>Risk Level</b> | D                | B              | B                | A                      | A            | A            | A               | A        | A                   |
| alendronate       | 0                | 0              | 0                | 0                      | 0            | 0            | 0               | 0        | 0                   |
| ibuprofen         | 2                | 1              | 0                | 0                      | 0            | 0            | 0               | 0        | 0                   |
| metformin         | 0                | 0              | 0                | 0                      | 0            | 0            | 0               | 0        | 0                   |
| methotrexate      | 1                | 1              | 2                | 0                      | 0            | 0            | 0               | 0        | 0                   |
| metronidazole     | 0                | 0              | 1                | 0                      | 0            | 0            | 1               | 0        | 0                   |
| ranitidine        | 0                | 0              | 0                | 0                      | 0            | 0            | 0               | 0        | 0                   |
| warfarin          | 3                | 0              | 0                | 0                      | 0            | 0            | 0               | 0        | 0                   |

**Interactions** ⓘ

- ⓘ Flagyl / Marevan A marked increase in the effect of warfarin and bleeding may occur due to concomitant systemic metronidazole. Topical metronidazole may also increase warfarin-induced anticoagulation, but to a lesser extent. [D] ⓘ
- ⓘ Burana / Marevan Concomitant use of non-steroidal anti-inflammatory drugs (NSAIDs) and warfarin can cause severe bleedings. The risk for upper gastrointestinal bleeding is increased 2 to 3-fold compared with warfarin only. [D] ⓘ

**Fig 3a: Electronic case report form (eCRF)**

|                                                                                                                                                                                                                                                                                                                                                                                                                                                                                                                                                                                                                                                                                                                                                                                                                                                                                                                                                                                                                |
|----------------------------------------------------------------------------------------------------------------------------------------------------------------------------------------------------------------------------------------------------------------------------------------------------------------------------------------------------------------------------------------------------------------------------------------------------------------------------------------------------------------------------------------------------------------------------------------------------------------------------------------------------------------------------------------------------------------------------------------------------------------------------------------------------------------------------------------------------------------------------------------------------------------------------------------------------------------------------------------------------------------|
| <b>Needed patient data/further explanation and information</b>                                                                                                                                                                                                                                                                                                                                                                                                                                                                                                                                                                                                                                                                                                                                                                                                                                                                                                                                                 |
| <b><u>PATIENT IDENTITY</u></b> <ul style="list-style-type: none"><li>○ Internal Study ID</li><li>○ Year of birth</li><li>○ Gender (male/female)</li><li>○ Patient has signed informed consent → tick box for "yes" (this is necessary for entering the following data/ to perform medication review)</li></ul> <p>after this section the "new patient" will be created and baseline data can be entered</p>                                                                                                                                                                                                                                                                                                                                                                                                                                                                                                                                                                                                    |
| <b><u>CURRENT MEDICATION</u></b> <p>Please provide current continuous and temporary medication including over-the-counter medication, herbal treatment and treatment prescribed by other medical specialists. You can search directly by the drug's ATC code or by the generic name. Drug brand names are not included. For combination drugs all active components must be entered separately as if they were separate drugs. Exact start dates are not needed at baseline. It is sufficient to use the default value 1.1.2013.</p> <ul style="list-style-type: none"><li>○ Name + ATC code (out of drop-down menu)</li><li>○ Frequency (daily - weekly -as needed- other)</li><li>○ Administration route (oral - rectal -parenteral – topical)</li><li>○ Start date of medication</li><li>○ End date and reason for discontinuation (ending a temporary treatment - adverse drug event - after reconsideration - patient's choice or which – false entry– other)</li><li>○ total daily dose + unit</li></ul> |
| <b><u>DIAGNOSES</u></b> <p>the following list shows the most frequent chronic diseases, please select:</p> <ul style="list-style-type: none"><li>○ Primary hypertension</li><li>○ Type2 diabetes</li><li>○ Hypercholesterolemia</li><li>○ History of myocardial infarction</li><li>○ Chronic heart failure</li><li>○ Chronic ischemic heart disease</li><li>○ Atrial fibrillation</li><li>○ Stroke or TIA</li><li>○ Asthma</li><li>○ COPD</li><li>○ Depression</li><li>○ Insomnia</li><li>○ Gastroesophageal reflux</li><li>○ Benign prostatic hyperplasia</li><li>○ Osteoporosis without fracture</li><li>○ Arthrosis</li><li>○ Back pain</li><li>○ Gout</li><li>○ Hypothyroidism</li></ul>                                                                                                                                                                                                                                                                                                                   |

- Rheumatoid arthritis

Renal insufficiency is automatically calculated from the GFR.

### **OTHER DIAGNOSES RELEVANT TO THE MEDICATION**

Please provide all permanent diagnoses, current temporary diagnoses and previous diagnoses possibly significant for the treatment.

You can search directly by the ICD-10 code or by the name of the disease in the eCRF.

Exact diagnosis start dates are not needed at baseline. It is sufficient to use the default value 1.1.2013.

- Name + ICD 10 Code as drop down menu
- Start date
- End date (remove diagnosis from the list)
- If an end date is set: Reason for removal (False entry – cured/not active)

### **SYMPTOMS WITHIN ONE MONTH**

Please provide all symptoms compromising the patient's quality of life within the time frame of the previous month by ticking the appropriate box.

- Constipation
- Nausea/ vomiting
- Diarrhea
- Dyspepsia/abdominal discomfort
- Dizziness/vertigo
- Fatigue
- Sleeping problems
- Confusion/delirium
- Pain
- Dyspnea
- Cough
- Rash or itching
- Nycturia
- Leg swelling
- Other (please list)

### **FALLS**

Please enter the number of falls and the severity of injury of falls of this patient during the last 3 months - select out of the following:

- None
- Number of falls with moderate/severe injury

#### Information on falls

- Serious injury: Medically recorded fracture, head or internal injury requiring accident and emergency or inpatient treatment.
- Moderate injury: Wounds, bruises, sprains, cuts requiring a medical/health professional examination such as physical examination, x-ray, suture.
- Minor injury: Minor bruises or abrasions not requiring health professional assistance; reduction in physical function (e.g. due to pain, fear of falling) for at least three days.
- No injury: No physical injury detected.

## **MEASUREMENTS AND PROCEDURES**

Please provide anthropometric measurements, blood pressure, frailty scale, smoking status and creatinine. Please carry out if not available in your records.

All other lab results are only to be provided if they are available in your records. Otherwise please leave blank as we want to avoid additional laboratory analyses.

- Height
- Weight + date
- BP (Blood Pressure) + date (enter a typical/average BP based on several recent measurements. Use latest measurement if several recent measurements are not available)
- Smoking status (non-smoker - smoker - ex-smoker - not known)
- Creatinine + date
- Total Cholesterol
- HDL Cholesterol
- Triglycerides
- LDL Cholesterol
- Fasting Glucose
- HbA1c + date
- INR + date
- B-Hb + date
- Platelet count + date
- ALT + date
- Potassium + date
- Sodium +date
- Proteinuria (Yes/No)

## **PROCEDURES (Yes/No)**

- Drug Eluting Stent + date
- Transcatheter Aortic Valve Replacement + date
- Heart Valve Replacement mechanical + date

## **FRAILITY**

Frailty scale - Read more about frailty scale on the link on the eCRF or on

[http://www.ebmeds.org/cmr/Annex\\_II\\_Frailty\\_scale.pdf](http://www.ebmeds.org/cmr/Annex_II_Frailty_scale.pdf)

Please select:

- Managing Well: Medical problems well controlled, patient not regularly active beyond routine walking.
- Vulnerable: Not dependent on others for daily help. Being "slowed up", and/or being tired during the day.
- Mildly Frail: More evident "slowed up", and/or being tired during the day, need help in some daily activities (i.e. finances, heavy housework).
- Moderately Frail: Need help with all outside activities/keeping house. Have problems with stairs, need help for bathing and minimal assistance with dressing.
- Severely Frail: Completely dependent for personal care, from whatever cause (physical or cognitive). Not at high risk of dying (within ~ 6 months).
- Very Severely Frail/Terminally Ill: Completely dependent, approaching the end of life (life expectancy < 6 months).

## **HOSPITALIZATIONS**

Please provide information about all non-elective hospitalisations of this patient during the course of the study.  
 If you wish to add a diagnosis and cannot find it on the list, please give your feedback on the link in the eCRF.

|                                    |  |
|------------------------------------|--|
| None                               |  |
| Reason: disease name or ICD10 code |  |
| Admission date                     |  |
| Length (nights)                    |  |

**DEATH**

Please provide information about date and cause of death

|                                            |  |
|--------------------------------------------|--|
| Date of death                              |  |
| Cause of death: disease name or ICD10 code |  |
